# Supplementary material for: PYTHIA: Deep Learning Approach for Local Protein Conformation Prediction
Source: MDPI journal article supplement (doi:10.3390/ijms22168831), 2021-08-17
Supplement: s1 [file s1]

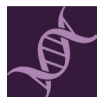

## Supplementary materials

**Table S1:** Comparison of PYTHIA global accuracy model against PYTHIA balanced accuracy model.

| PB    | TPR/SENS |       |      | F1 Score |       |      | MCC  |       |      |
|-------|----------|-------|------|----------|-------|------|------|-------|------|
|       | PYTH     | PYTHb | DIFF | PYTH     | PYTHb | DIFF | PYTH | PYTHb | DIFF |
| a     | 60.7     | 67.0  | 6.3  | 62.9     | 58.5  | 4.5  | 61.2 | 56.4  | 4.8  |
| b     | 39.2     | 43.0  | 3.8  | 45.1     | 41.4  | 3.8  | 42.9 | 37.4  | 5.5  |
| c     | 52.8     | 49.9  | 2.9  | 55.5     | 52.6  | 2.9  | 50.6 | 46.9  | 3.7  |
| d     | 78.4     | 61.5  | 16.9 | 75.4     | 70.4  | 5.0  | 67.7 | 63.4  | 4.3  |
| e     | 55.9     | 62.7  | 6.7  | 55.7     | 51.6  | 4.1  | 54.4 | 50.6  | 3.8  |
| f     | 57.4     | 57.4  | 0.0  | 60.2     | 57.0  | 3.2  | 56.8 | 52.6  | 4.2  |
| g     | 16.0     | 34.1  | 18.0 | 22.9     | 22.7  | 0.2  | 24.8 | 22.4  | 2.4  |
| h     | 49.4     | 59.7  | 10.3 | 51.6     | 48.0  | 3.5  | 50.3 | 47.1  | 3.3  |
| i     | 45.0     | 55.3  | 10.3 | 49.3     | 46.2  | 3.1  | 48.6 | 45.5  | 3.1  |
| j     | 35.2     | 56.5  | 21.3 | 37.2     | 35.9  | 1.3  | 36.6 | 37.5  | 0.9  |
| k     | 61.7     | 61.7  | 0.1  | 63.0     | 59.4  | 3.6  | 60.3 | 56.0  | 4.3  |
| l     | 54.1     | 57.9  | 3.8  | 59.0     | 54.2  | 4.8  | 56.6 | 50.5  | 6.0  |
| m     | 91.8     | 80.3  | 11.5 | 87.2     | 85.9  | 1.3  | 77.7 | 76.7  | 1.0  |
| n     | 67.2     | 72.8  | 5.6  | 67.1     | 60.3  | 6.7  | 66.3 | 60.1  | 6.2  |
| o     | 65.8     | 71.2  | 5.4  | 65.7     | 59.8  | 5.8  | 64.5 | 59.0  | 5.6  |
| p     | 57.6     | 60.5  | 2.9  | 57.1     | 51.4  | 5.7  | 55.1 | 49.2  | 5.9  |
| Macro | 55.5     | 59.5  | 4.0  | 57.2     | 53.5  | 3.7  | 54.7 | 50.7  | 4.0  |
| Micro | 71.1     | 65.4  | 5.7  | 71.1     | 65.4  | 5.7  | 68.5 | 62.0  | 6.5  |

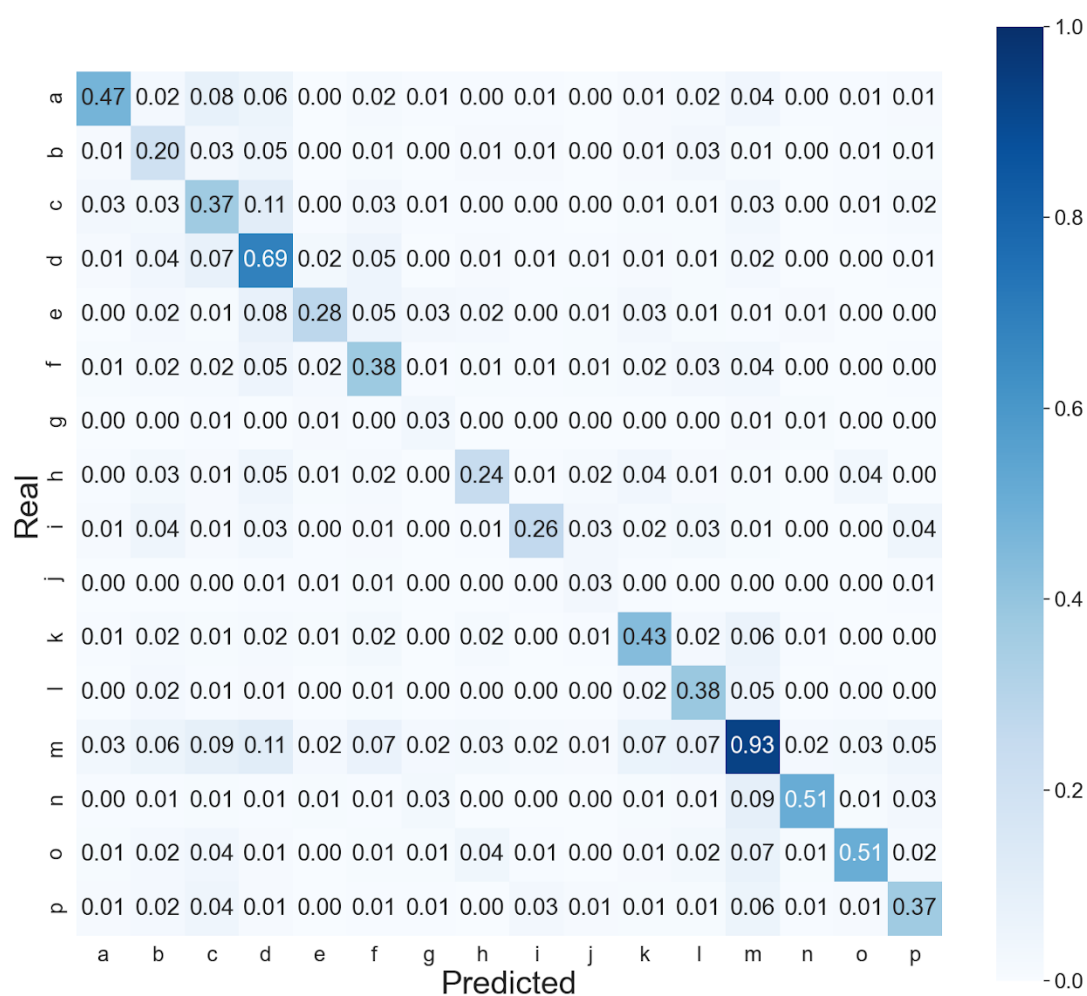

**Figure S1:** Normalized confusion matrix of predictions of LOCUSTRA on the test dataset.

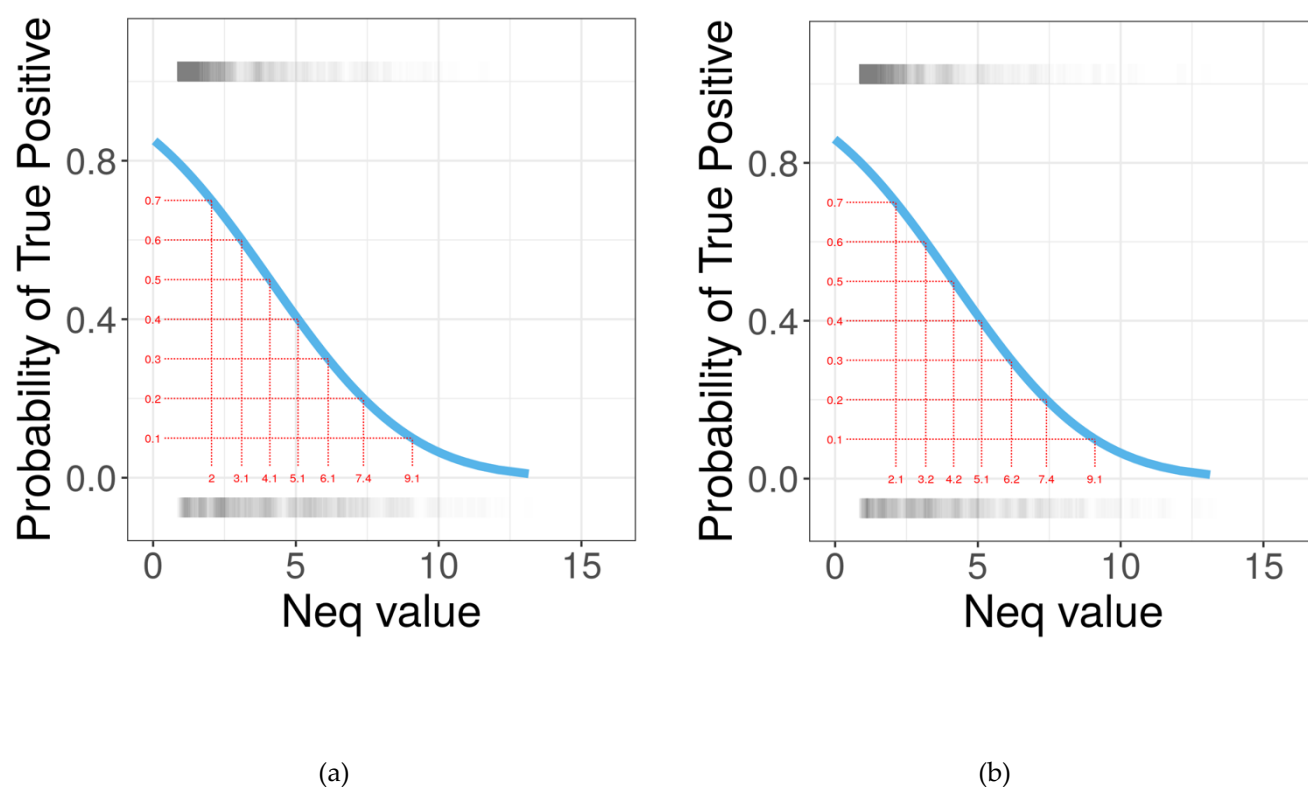

**Figure S2:** Probability of true positive as a function of the local variability of PB for global accuracy mode (a) and balanced accuracy model (b).  $N_{eq}$  quantifies the average number of PBs at a given position in the protein sequence from 1 to 16 (fully random distribution of PBs). This value is an entropy based index (see Materials and Methods formula 5). The curve is obtained by fitting a generalized linear regression model.

**Table S2.** True positive rates for the balanced accuracy PYTHIA model.

| PBs      | TOP 1        | TOP 2        | TOP 3        | TOP 4        | TOP 5        |
|----------|--------------|--------------|--------------|--------------|--------------|
| <b>a</b> | 66.96 ± 1.22 | 74.1 ± 1.28  | 80.67 ± 1.18 | 84.74 ± 1.09 | 87.96 ± 0.94 |
| <b>b</b> | 43.03 ± 2.6  | 63.62 ± 2.76 | 77.11 ± 2.49 | 86.28 ± 2.11 | 91.08 ± 1.44 |
| <b>c</b> | 49.89 ± 1.34 | 72.05 ± 1.47 | 81.24 ± 1.44 | 87.29 ± 1.15 | 91.84 ± 0.94 |
| <b>d</b> | 61.48 ± 1.87 | 76.51 ± 1.73 | 84.4 ± 1.52  | 88.52 ± 1.38 | 91.48 ± 1.15 |
| <b>e</b> | 62.66 ± 1.81 | 75.63 ± 1.62 | 82.09 ± 1.32 | 85.12 ± 1.2  | 87.51 ± 1.06 |
| <b>f</b> | 57.38 ± 2.08 | 72.12 ± 1.75 | 80.89 ± 1.32 | 87.42 ± 0.8  | 91.31 ± 0.74 |
| <b>g</b> | 34.05 ± 1.44 | 56.92 ± 2.7  | 66.86 ± 2.93 | 74.1 ± 2.85  | 79.21 ± 2.5  |
| <b>h</b> | 59.66 ± 1.68 | 74.24 ± 1.27 | 79.33 ± 1.26 | 83.06 ± 1.03 | 86.19 ± 0.86 |
| <b>i</b> | 55.33 ± 1.79 | 69.61 ± 1.73 | 75.97 ± 1.54 | 79.14 ± 1.42 | 81.9 ± 1.38  |
| <b>j</b> | 56.53 ± 3.44 | 69.18 ± 2.56 | 76.29 ± 2.27 | 79.68 ± 2.09 | 82.24 ± 1.83 |
| <b>k</b> | 61.73 ± 1.42 | 73.14 ± 1.46 | 81.56 ± 1.35 | 86.6 ± 1.12  | 90.44 ± 0.89 |
| <b>l</b> | 57.91 ± 1.76 | 75.06 ± 1.32 | 82.02 ± 1.14 | 86.3 ± 0.97  | 89.89 ± 0.89 |
| <b>m</b> | 80.34 ± 1.46 | 87.91 ± 1.03 | 91.53 ± 0.88 | 93.7 ± 0.75  | 94.97 ± 0.66 |

|              |              |              |              |              |              |
|--------------|--------------|--------------|--------------|--------------|--------------|
| <b>n</b>     | 72.82 ± 2.28 | 81.43 ± 1.73 | 86.26 ± 1.38 | 88.5 ± 1.18  | 90.16 ± 1.18 |
| <b>o</b>     | 71.19 ± 1.86 | 80.51 ± 1.03 | 84.15 ± 0.89 | 86.93 ± 0.85 | 89.65 ± 0.8  |
| <b>p</b>     | 60.46 ± 2.16 | 75.23 ± 1.83 | 82.94 ± 1.21 | 87.28 ± 0.94 | 90.65 ± 0.65 |
| <b>Micro</b> | 65.56 ± 1.06 | 78.36 ± 0.88 | 84.95 ± 0.75 | 88.96 ± 0.64 | 91.73 ± 0.51 |
| <b>Macro</b> | 59.46 ± 1.23 | 73.57 ± 0.89 | 80.84 ± 0.73 | 85.3 ± 0.62  | 88.54 ± 0.48 |

**Table S3.** True positive rates for the global accuracy PYTHIA model. “Macro” average (averaging the unweighted mean per class) and “Micro” average (averaging the total true positives, false negatives and false positives).

| <b>PBs</b>   | <b>TOP 1</b> | <b>TOP 2</b> | <b>TOP 3</b> | <b>TOP 4</b> | <b>TOP 5</b> |
|--------------|--------------|--------------|--------------|--------------|--------------|
| <b>a</b>     | 60,65 ± 1,55 | 68,32 ± 1,5  | 77,32 ± 1,13 | 82,07 ± 0,88 | 85,48 ± 0,71 |
| <b>b</b>     | 39,23 ± 2,12 | 58,5 ± 2,18  | 72,62 ± 1,85 | 82,8 ± 1,36  | 88,73 ± 1,03 |
| <b>c</b>     | 52,82 ± 1,4  | 77,85 ± 1,09 | 87,37 ± 0,66 | 92,07 ± 0,45 | 95,42 ± 0,28 |
| <b>d</b>     | 78,38 ± 1,2  | 89,1 ± 0,9   | 93 ± 0,67    | 95,12 ± 0,45 | 96,55 ± 0,33 |
| <b>e</b>     | 55,93 ± 1,02 | 70,22 ± 1,36 | 78,03 ± 1,02 | 82,13 ± 1,09 | 85,47 ± 0,98 |
| <b>f</b>     | 57,42 ± 1,33 | 74,05 ± 0,97 | 82,87 ± 0,74 | 89,07 ± 0,6  | 92,3 ± 0,54  |
| <b>g</b>     | 16,02 ± 0,74 | 34,25 ± 1,87 | 49,02 ± 2,31 | 62,05 ± 2,56 | 70,27 ± 1,68 |
| <b>h</b>     | 49,37 ± 1,91 | 64,07 ± 1,9  | 71,48 ± 1,66 | 76,88 ± 1,67 | 81,32 ± 1,26 |
| <b>i</b>     | 45,03 ± 1,66 | 58,9 ± 1,57  | 66,68 ± 2,09 | 72,25 ± 1,7  | 76,4 ± 1,83  |
| <b>j</b>     | 35,23 ± 2,66 | 55,73 ± 2,05 | 68,97 ± 2,22 | 76,97 ± 2,31 | 81,7 ± 1,77  |
| <b>k</b>     | 61,65 ± 1,47 | 73,87 ± 1,39 | 82,5 ± 1,25  | 87,2 ± 1,04  | 90,82 ± 0,74 |
| <b>l</b>     | 54,13 ± 1,13 | 74,53 ± 1,07 | 82,27 ± 0,82 | 86,27 ± 0,7  | 89,72 ± 0,5  |
| <b>m</b>     | 91,82 ± 0,38 | 96,37 ± 0,23 | 97,6 ± 0,18  | 98,23 ± 0,15 | 98,7 ± 0,13  |
| <b>n</b>     | 67,17 ± 2,02 | 78,57 ± 1,49 | 83,87 ± 1,13 | 86,47 ± 1,11 | 88,3 ± 1,29  |
| <b>o</b>     | 65,77 ± 1,8  | 75,87 ± 1,76 | 80,15 ± 1,85 | 83,52 ± 1,62 | 86,53 ± 1,41 |
| <b>p</b>     | 57,55 ± 1,87 | 72,27 ± 1,35 | 79,65 ± 1,13 | 84,98 ± 1    | 88,9 ± 0,55  |
| <b>Micro</b> | 71,13 ± 0,94 | 82,72 ± 0,8  | 88,15 ± 0,59 | 91,4 ± 0,45  | 93,65 ± 0,33 |
| <b>Macro</b> | 55,5 ± 1,31  | 70,17 ± 1,16 | 78,35 ± 1    | 83,62 ± 0,89 | 87,28 ± 0,7  |
